# Supplementary material for: Associations of Change in Body Size With All-Cause and Cause-Specific Mortality Among Healthy Older Adults
Source: PubMed Central journal article supplement (PMC10087052; doi:10.1001/jamanetworkopen.2023.7482), 2023-04-10
Supplement: jamanetwopen-e237482-s001.pdf [file jamanetwopen-e237482-s001.pdf]

## Supplementary Online Content

Hussain SM, Newman AB, Beilin LJ, et al. Associations of change in body size with all-cause and cause-specific mortality among healthy older adults. *JAMA Netw Open*. 2023;6(4):e237482. doi:10.1001/jamanetworkopen.2023.7482

**eTable 1.** Characteristics of Aspirin in Reducing Events in the Elderly Trial Participants Overall, and by Waist Circumference (WC) Change Category From Recruitment Until Annual Visit 2

**eTable 2.** Association Between Weight Change Categories and Risk of Mortality (HR, 95% CI) Excluding the US Participants (6500 Men and 7704 Women)

**eTable 3.** Association Between Body Weight Change Categories and Risk of Mortality (HR, 95% CI) Excluding Those With Baseline Cognitive Impairment (7128 Men, 8984 Women)

**eTable 4.** Association Between Body Weight Change Categories and Risk of Mortality (HR, 95% CI) (Restricting the Analysis After AV3: 6161 Men, 7817 Women)

**eTable 5.** Association Between Body Weight Change Categories and Risk of Mortality (HR, 95% CI) Stratified by Obesity Status

**eTable 6.** Association Between Body Weight Change Categories and Risk of Mortality (HR, 95% CI) Stratified by Age at Recruitment

**eTable 7.** Association Between Body Weight Change Categories and Risk of Mortality (HR, 95% CI) Stratified by Interim Hospitalisation Status During Change in Body Size Measurement

**eTable 8.** Association Between Waist Circumference Change Categories and Risk of Mortality (HR, 95% CI) Excluding the US

**eTable 9.** Association Between Waist Circumference Change Categories and Risk of Mortality (HR, 95% CI) Excluding Those With Baseline Cognitive Impairment

**eTable 10.** Association Between Waist Circumference Change Categories and Risk of Mortality (HR, 95% CI) (Restricting the Analysis After AV3)

**eTable 11.** Association Between Waist Circumference Change Categories and Risk of Mortality (HR, 95% CI) Stratified by Obesity Status

**eTable 12.** Association Between Waist Circumference Change Categories and Risk of Mortality (HR, 95% CI) Stratified by Age at Recruitment

**eTable 13.** Association Between Waist Circumference Change Categories and Risk of Mortality (HR, 95% CI) Stratified by Interim Hospitalisation Status

**eTable 14.** Overview of Systematic Reviews and Cohort Studies Investigating the Association Between Weight Change in Kilogram, Body Mass Index, Waist Circumference and Mortality in Noninstitutionalized People

This supplementary material has been provided by the authors to give readers additional information about their work.

**eTable 1.** Characteristics of Aspirin in Reducing Events in the Elderly Trial Participants Overall, and by Waist Circumference (WC) Change Category From Recruitment Until Annual Visit 2

|                                          | All          | Within 5% change | 5-10% increase | >10% increase | 5-10% decrease | >10% decrease | p     |
|------------------------------------------|--------------|------------------|----------------|---------------|----------------|---------------|-------|
| N (%)                                    | 16523        | 10234 (61.9)     | 295 (12.7)     | 973 (5.9)     | 2309 (14.0)    | 912 (5.5)     |       |
| Age in years, mean (SD)                  | 75.0 (4.4)   | 75.0 (4.4)       | 74.8 (4.3)     | 75.0 (4.4)    | 75.1 (4.6)     | 75.7 (4.5)    | <.001 |
| Women, n (%)                             | 9193 (55.6)  | 5098 (49.8)      | 1271 (60.7)    | 731 (75.2)    | 1405 (60.9)    | 688 (75.4)    | <.001 |
| Country, n (%)                           |              |                  |                |               |                |               | <.001 |
| Australia                                | 14632 (88.6) | 9152 (89.4)      | 1845 (88.1)    | 814 (83.7)    | 2041 (88.4)    | 780 (85.5)    |       |
| USA                                      | 1891 (11.4)  | 1082 (10.6)      | 250 (11.9)     | 159 (16.3)    | 268 (11.6)     | 132 (14.5)    |       |
| Low physical activity, n (%)             | 1139 (6.9)   | 682 (6.7)        | 146 (7.0)      | 65 (6.7)      | 171 (7.4)      | 75 (8.2)      | .38   |
| BMI (kg/m <sup>2</sup> ), mean (SD)      | 28.1 (4.6)   | 28.2 (4.6)       | 27.8 (4.6)     | 27.4 (4.8)    | 28.2 (4.9)     | 27.8 (5.0)    | <.001 |
| Waist Circumference (cm), mean (SD)      | 97.1 (12.7)  | 98.2 (12.4)      | 93.2 (11.6)    | 87.2 (11.9)   | 99.1 (12.7)    | 99.4 (13.0)   | <.001 |
| Current/former smoking, n (%)            | 7276 (44.0)  | 4615 (45.1)      | 900 (43.0)     | 397 (40.1)    | 982 (42.5)     | 382 (42.0)    | .01   |
| Current alcohol use, n (%)               | 12806 (77.5) | 8014 (78.3)      | 1625 (77.6)    | 743 (76.4)    | 1761 (76.3)    | 663 (72.7)    | .001  |
| Education, n (%)                         |              |                  |                |               |                |               | .05   |
| <12 years of schooling                   | 9371 (56.7)  | 5877 (57.4)      | 1179 (56.3)    | 521 (53.6)    | 1303 (56.4)    | 491 (53.8)    |       |
| ≥12 years of schooling                   | 7152 (43.3)  | 4357 (42.6)      | 916 (43.7)     | 452 (46.5)    | 1006 (43.6)    | 421 (46.2)    |       |
| Hypertension, (%)                        | 12222 (74.0) | 7618 (74.4)      | 1496 (71.4)    | 711 (73.1)    | 1724 (74.7)    | 673 (73.8)    | .06   |
| Dyslipidaemia, (%)                       | 10789 (65.3) | 6681 (65.3)      | 1349 (64.4)    | 624 (64.1)    | 1527 (66.1)    | 608 (66.7)    | .56   |
| Chronic kidney disease, (%)              | 2878 (17.9)  | 1746 (17.5)      | 334 (16.3)     | 183 (19.3)    | 417 (18.5)     | 200 (22.3)    | .001  |
| Diabetes, n (%)                          | 1721 (10.4)  | 1126 (11.0)      | 197 (9.4)      | 79 (8.1)      | 248 (10.7)     | 71 (7.8)      | .001  |
| Prefrail/Frail, (%)                      | 6503 (39.4)  | 3928 (38.4)      | 803 (38.3)     | 414 (42.6)    | 940 (40.7)     | 418 (45.8)    | <.001 |
| ≥1 Interim hospitalisation               | 3403 (20.6)  | 2052 (20.1)      | 407 (19.4)     | 198 (20.4)    | 517 (22.4)     | 229 (25.1)    | <.001 |
| On trial medication (100mg Aspirin), (%) | 8199 (49.6)  | 5029 (49.1)      | 1042 (49.7)    | 516 (53.0)    | 1177 (51.0)    | 435 (47.7)    | .07   |
| <b>Outcome</b>                           |              |                  |                |               |                |               |       |
| All-cause mortality, (%)                 | 1256 (7.6)   | 749 (7.3)        | 154 (7.4)      | 58 (6.0)      | 189 (8.2)      | 106 (11.6)    | <.001 |
| Cancer Mortality, (%)                    | 563 (3.6)    | 339 (3.5)        | 74 (3.7)       | 26 (2.8)      | 80 (3.6)       | 44 (5.2)      | .04   |
| Cardiovascular disease mortality, (%)    | 316 (2.0)    | 190 (2.0)        | 36 (1.8)       | 16 (1.7)      | 49 (2.3)       | 25 (3.0)      | .24   |
| Non-CV, non-Cancer mortality             | 377 (2.4)    | 220 (2.3)        | 44 (2.2)       | 16 (1.7)      | 60 (2.8)       | 37 (4.4)      | .001  |

SD, Standard deviation; USA, United States of America; WC, waist circumference; CV, Cardiovascular

**eTable 2.** Association Between Weight Change Categories and Risk of Mortality (HR, 95% CI) Excluding the US Participants (6500 Men and 7704 Women)

|                                         | Within 5% of change | 5-10% increase     | >10% increase     | 5-10% decrease    | >10% decrease     |
|-----------------------------------------|---------------------|--------------------|-------------------|-------------------|-------------------|
| <b>All-cause mortality</b>              |                     |                    |                   |                   |                   |
| Men                                     | 1                   | 1.53 (1.15-2.03)   | 1.52 (0.83-2.77)  | 1.30 (1.04-1.65)  | 4.02 (3.00-5.39)  |
| Women                                   | 1                   | 0.65 (0.43, 1.00)  | 1.33 (0.78-2.28)  | 1.31 (1.02-1.70)  | 2.10 (1.51-2.94)  |
| <b>Cancer death</b>                     |                     |                    |                   |                   |                   |
| Men                                     | 1                   | 1.46 (0.97, 2.22)  | 1.74 (0.77-3.93)  | 1.16 (0.81-1.66)  | 3.67 (2.35-5.63)  |
| Women                                   | 1                   | 0.86 (0.49, 1.-48) | 0.86 (0.32, 2.32) | 1.49 (1.04, 2.14) | 2.50 (1.56-4.00)  |
| <b>Cardiovascular disease mortality</b> |                     |                    |                   |                   |                   |
| Men                                     | 1                   | 1.70 (0.97-2.00)   | 1.24 (0.30, 5.03) | 1.28 (0.80, 2.06) | 3.52 (1.82-6.82)  |
| Women                                   | 1                   | 0.60 (0.26-1.38)   | 1.40 (0.51, 3.83) | 1.12 (0.68, 1.86) | 1.83 (0.95, 3.55) |
| <b>Non cancer, non CV mortality</b>     |                     |                    |                   |                   |                   |
| Men                                     | 1                   | 1.48 (0.87-2.54)   | 1.38 (0.44-4.34)  | 1.53 (1.03-2.28)  | 4.91 (3.02-7.98)  |
| Women                                   | 1                   | 0.32 (0.11-1.01)   | 2.07 (0.90-4.74)  | 1.21 (0.74-2.00)  | 1.76 (0.91-3.43)  |

US, United States; Adjusted for age, frailty status, smoking status, alcohol intake, education, hypertension, chronic kidney disease, diabetes, interim hospitalisation status

**eTable 3.** Association Between Body Weight Change Categories and Risk of Mortality (HR, 95% CI) Excluding Those With Baseline Cognitive Impairment (7128 Men, 8984 Women)

|                                     | Within 5% change | 5-10% increase   | >10% increase     | 5-10% decrease    | >10% decrease    |
|-------------------------------------|------------------|------------------|-------------------|-------------------|------------------|
| <b>All-cause mortality</b>          |                  |                  |                   |                   |                  |
| Men                                 | 1                | 1.44 (1.09-1.91) | 1.37 (0.75-2.49)  | 1.35 (1.08-1.69)  | 4.23 (3.19-5.61) |
| Women                               | 1                | 0.75 (0.52-1.09) | 1.47 (0.90-2.39)  | 1.27 (0.99- 1.60) | 2.14 (1.58-2.90) |
| <b>Cancer death</b>                 |                  |                  |                   |                   |                  |
| Men                                 | 1                | 1.36 (0.89-2.06) | 1.58 (0.70-3.59)  | 1.23 (0.89-1.73)  | 3.92 (2.54-6.03) |
| Women                               | 1                | 0.79 (0.45-1.36) | 0.80 (0.30-2.15)  | 1.44 (1.01-2.03)  | 2.78 (1.82-4.26) |
| <b>Cardiovascular mortality</b>     |                  |                  |                   |                   |                  |
| Men                                 | 1                | 1.58 (0.90-2.75) | 1.10 (0.27-4.48)  | 1.35 (0.86, 2.10) | 3.31 (1.71-6.35) |
| Women                               | 1                | 0.93 (0.48-1.78) | 1.30 (0.48-3. 54) | 1.14 (0.71-1.82)  | 1.92 (1.05-3.51) |
| <b>Non cancer, non CV mortality</b> |                  |                  |                   |                   |                  |
| Men                                 | 1                | 1.48 (0.88-2.49) | 1.24 (0.39-3.90)  | 1.53 (1.04-2.24)  | 5.39 (3.41-8.52) |
| Women                               | 1                | 0.52 (0.23-1.19) | 2.58 (1.30-5.11)  | 1.12 (0.71-1.76)  | 1.49 (0.80-2.79) |

Adjusted for age, frailty status, country of birth, smoking status, alcohol intake, education, hypertension, chronic kidney disease, diabetes, interim hospitalisation status

**eTable 4.** Association Between Body Weight Change Categories and Risk of Mortality (HR, 95% CI) (Restricting the Analysis After AV3: 6161 Men, 7817 Women)

|                                         | Within 5% change | 5-10% increase   | >10% increase    | 5-10% decrease   | >10% decrease     |
|-----------------------------------------|------------------|------------------|------------------|------------------|-------------------|
| <b>All-cause mortality</b>              |                  |                  |                  |                  |                   |
| Men                                     | 1                | 1.40 (1.02-1.92) | 1.25 (0.62-2.52) | 1.31 (1.02-1.68) | 3.09 (2.13-4.48)  |
| Women                                   | 1                | 0.84 (0.56-1.24) | 1.51 (0.86-2.63) | 1.20 (0.90-1.58) | 1.63 (1.08-2.46)  |
| <b>Cancer death</b>                     |                  |                  |                  |                  |                   |
| Men                                     | 1                | 1.62 (1.06-2.48) | 1.30 (0.48-3.51) | 1.29 (0.89-1.86) | 2.03 (1.07-3.87)  |
| Women                                   | 1                | 0.90 (0.51-1.58) | 1.01 (0.37-2.75) | 1.28 (0.85-1.93) | 1.95 (1.09-3.46)  |
| <b>Cardiovascular disease mortality</b> |                  |                  |                  |                  |                   |
| Men                                     | 1                | 1.43 (0.74-2.74) | 1.39 (0.34-5.65) | 1.40 (0.86-2.27) | 3.18 (1.46-6.93)  |
| Women                                   | 1                | 0.97 (0.47-2.01) | 1.30 (0.41-4.12) | 1.10 (0.63-1.92) | 1.42 (0.62-3.29)  |
| <b>Non cancer, non CV mortality</b>     |                  |                  |                  |                  |                   |
| Men                                     | 1                | 0.96 (0.47-2.00) | 1.06 (0.26-4.39) | 1.24 (0.78-1.98) | 4.80 (2.73, 8.54) |
| Women                                   | 1                | 0.59 (0.24-1.45) | 2.52 (1.07-5.79) | 1.15 (0.67-1.98) | 1.34 (0.58-3.08)  |

AV3, Annual visit 3; Adjusted for age, frailty status, country of birth, smoking status, alcohol intake, education, hypertension, chronic kidney disease, diabetes, interim hospitalisation status

**eTable 5.** Association Between Body Weight Change Categories and Risk of Mortality (HR, 95% CI) Stratified by Obesity Status

|                                         | Non-obese (n=11669) |                  |                   |                  |                  | Obese (n=4832)   |                  |                   |                  |                   |
|-----------------------------------------|---------------------|------------------|-------------------|------------------|------------------|------------------|------------------|-------------------|------------------|-------------------|
|                                         | Within 5% change    | 5-10% increase   | >10% increase     | 5-10% decrease   | >10% decrease    | Within 5% change | 5-10% increase   | >10% increase     | 5-10% decrease   | >10% decrease     |
| <b>All-cause mortality</b>              |                     |                  |                   |                  |                  |                  |                  |                   |                  |                   |
| Men                                     | 1                   | 1.48 (1.09-2.06) | 1.230 (0.63-2.39) | 1.23 (0.94-1.61) | 4.29 (3.04-6.05) | 1                | 1.34 (0.76-2.39) | 2.60 (0.64-10.60) | 1.58 (1.072,34)  | 4.20 (2.52-6.97)  |
| Women                                   | 1                   | 0.72 (0.46-1.13) | 1.17 (0.63-2.22)  | 1.37 (1.06-1.82) | 2.19 (1.47-3.27) | 1                | 0.83 (0.42-1.63) | 2.49 (1.16-5.37)  | 1.09 (0.70-1.70) | 2.29 (1.42-3.70)  |
| <b>Cancer death</b>                     |                     |                  |                   |                  |                  |                  |                  |                   |                  |                   |
| Men                                     | 1                   | 1.32 (0.80-2.13) | 1.49 (0.60-3.63)  | 1.01 (0.65-1.57) | 4.04 (2.37-6.90) | 1                | 1.48 (0.67-3.20) | 2.34 (0.32-17.40) | 1.57 (0.92-2.71) | 3.81 (1.79-8.13)  |
| Women                                   | 1                   | 0.77 (0.40-1.47) | 1.08 (0.40-2.95)  | 1.64 (1.09-2.41) | 2.44 (1.34-4.44) | 1                | 0.81 (0.29-2.24) | -                 | 1.18 (0.61-2.28) | 3.55 (1.90-6.63)  |
| <b>Cardiovascular disease mortality</b> |                     |                  |                   |                  |                  |                  |                  |                   |                  |                   |
| Men                                     | 1                   | 1.70 (0.91-3.21) | 1.24 (0.314,99)   | 1.35 (0.83-2.27) | 2.46 (1.00-6.15) | 1                | 1.20 (0.36-3.98) | -                 | 1.25 (0.54-2.92) | 4.53 (1.71-12.0)  |
| Women                                   | 1                   | 0.91 (0.41-1.89) | 0.91 (0.22-3.75)  | 0.98 (0.54-1.78) | 1.99 (0.91-4.35) | 1                | 1.02 (0.31-3.39) | 2.76 (0.65-11.66) | 1.50 (0.71-3.18) | 2.04 (0.78-5.32)  |
| <b>Non cancer, non CV mortality</b>     |                     |                  |                   |                  |                  |                  |                  |                   |                  |                   |
| Men                                     | 1                   | 1.58 (0.90-2.81) | 0.87 (0.21-3.45)  | 1.44 (0.91-2.26) | 5.93 (3.54-9.9)  | 1                | 1.26 (0.38-4.17) | 6.46 (0.85-49.8)  | 1.94 (0.92-4.07) | 4.49 (1.70-11.82) |
| Women                                   | 1                   | 0.47 (0.17-1.27) | 1.56 (0.57-4.31)  | 1.41 (0.84-2.33) | 2.04 (0.98-4.25) | 1                | 0.70 (0.17-2.92) | 5.46 (2.10-14.2)  | 0.59 (0.21-1.68) | 0.98 (0.29-3.24)  |

Adjusted for age, frailty status, country of birth, smoking status, alcohol intake, education, hypertension, chronic kidney disease, diabetes, interim hospitalisation status

**eTable 6.** Association Between Body Weight Change Categories and Risk of Mortality (HR, 95% CI) Stratified by Age at Recruitment

|                                         | <75 years (n=9922) |                  |                  |                  |                   | ≥75 years (n=6851) |                  |                  |                  |                   |
|-----------------------------------------|--------------------|------------------|------------------|------------------|-------------------|--------------------|------------------|------------------|------------------|-------------------|
|                                         | Within 5% change   | 5-10% increase   | >10% increase    | 5-10% decrease   | >10% decrease     | Within 5% change   | 5-10% increase   | >10% increase    | 5-10% decrease   | >10% decrease     |
| <b>All-cause mortality</b>              |                    |                  |                  |                  |                   |                    |                  |                  |                  |                   |
| Men                                     | 1                  | 1.17 (0.73-1.87) | 1.35 (0.55-3.29) | 1.40 (0.96-2.06) | 4.85 (2.97-7.92)  | 1                  | 1.63 (1.15-2.30) | 1.39 (0.62-3.12) | 1.34 (1.04-1.74) | 4.26 (3.01-6.04)  |
| Women                                   | 1                  | 0.80 (0.44-1.47) | 1.01 (0.37-2.86) | 1.46 (1.01-2.20) | 2.40 (1.40-4.12)  | 1                  | 0.72 (0.45-1.17) | 1.70 (0.97-2.98) | 1.18 (0.89-1.58) | 2.15 (1.46-3.10)  |
| <b>Cancer death</b>                     |                    |                  |                  |                  |                   |                    |                  |                  |                  |                   |
| Men                                     | 1                  | 1.12 (0.55-2.20) | 2.10 (0.77-5.56) | 1.48 (0.90-2.56) | 4.59 (2.30-9.16)  | 1                  | 1.59 (0.95-2.69) | 1.10 (0.27-4.49) | 1.13 (0.73-1.75) | 3.70 (2.11-6.45)  |
| Women                                   | 1                  | 0.58 (0.23-1.44) | -                | 1.69 (1.02-2.81) | 3.18 (1.68-6.04)  | 1                  | 0.98 (0.49-1.95) | 1.42 (0.51-3.83) | 1.27 (0.80-2.05) | 2.64 (1.50-4.65)  |
| <b>Cardiovascular disease mortality</b> |                    |                  |                  |                  |                   |                    |                  |                  |                  |                   |
| Men                                     | 1                  | 1.53 (0.59-3.92) | 1.28 (0.17-9.04) | 1.43 (0.60-3.43) | 4.21 (1.29-13.84) | 1                  | 1.51 (0.75-3.01) | 0.85 (0.12-6.15) | 1.28 (0.76-2.15) | 3.07 (1.38-6.74)  |
| Women                                   | 1                  | 1.86 (0.69-4.93) | 1.52 (0.20-11.0) | 1.42 (0.53-3.67) | 1.76 (0.41-7.64)  | 1                  | 0.62 (0.25-1.54) | 1.26 (0.40-3.99) | 1.11 (0.66-1.88) | 2.07 (1.07-4.01)  |
| <b>Non cancer, non CV mortality</b>     |                    |                  |                  |                  |                   |                    |                  |                  |                  |                   |
| Men                                     | 1                  | 1.04 (0.42-2.61) | -                | 1.21 (0.57-2.55) | 5.27 (2.24-12.40) | 1                  | 1.79 (0.96-3.38) | 2.33 (0.73-7.39) | 1.68 (1.07-2.63) | 6.15 (3.55-10.67) |
| Women                                   | 1                  | 0.55 (0.13-2.30) | 2.82 (0.85-9.34) | 0.95 (0.36-2.48) | 1.18 (0.28-5.01)  | 1                  | 0.49 (0.18-1.35) | 2.47 (1.07-5.42) | 1.16 (0.70-1.94) | 1.66 (0.83-3.33)  |

Adjusted for age, frailty status, country of birth, smoking status, alcohol intake, education, hypertension, chronic kidney disease, diabetes, interim hospitalisation status

**eTable 7.** Association Between Body Weight Change Categories and Risk of Mortality (HR, 95% CI) Stratified by Interim Hospitalisation Status During Change in Body Size Measurement

|                                         | Not hospitalised between baseline and annual visit 2 (n=13120) |                  |                   |                   |                   | Hospitalised before annual visit 2 (n=3403) |                   |                   |                   |                    |
|-----------------------------------------|----------------------------------------------------------------|------------------|-------------------|-------------------|-------------------|---------------------------------------------|-------------------|-------------------|-------------------|--------------------|
|                                         | Within 5% change                                               | 5-10% increase   | >10% increase     | 5-10% decrease    | >10% decrease     | Within 5% change                            | 5-10% increase    | >10% increase     | 5-10% decrease    | >10% decrease      |
| <b>All-cause mortality</b>              |                                                                |                  |                   |                   |                   |                                             |                   |                   |                   |                    |
| Men                                     | 1                                                              | 1.47 (1.04-2.01) | 1.36 (0.67-2.75)  | 1.18 (0.90-1.58)  | 3.18 (2.06-4.91)  | 1                                           | 1.48 (0.86-2.53)  | 1.40 (0.45-4.54)  | 1.60 (1.11-2.31)  | 4.60 (3.21-6.80)   |
| Women                                   | 1                                                              | 0.57 (0.36-0.91) | 1.03 (0.53-2.03)  | 1.26 (0.98-1.67)  | 1.53 (1.00-2.39)  | 1                                           | 1.40 (0.76-2.60)  | 2.61 (1.22-5.49)  | 1.28 (0.79-2.11)  | 3.58 (2.28-5.61)   |
| <b>Cancer death</b>                     |                                                                |                  |                   |                   |                   |                                             |                   |                   |                   |                    |
| Men                                     | 1                                                              | 1.37 (0.83-2.23) | 1.49 (0.55-4.02)  | 1.00 (0.63-1.56)  | 2.25 (1.06-4.73)  | 1                                           | 1.37 (0.62-3.00)  | 1.91 (0.46-7.85)  | 1.59 (0.94-2.69)  | 4.71 (2.71-8.20)   |
| Women                                   | 1                                                              | 0.72 (0.38-1.36) | 0.78 (0.25-2.24)  | 1.42 (0.98-2.11)  | 1.74 (0.98-3.28)  | 1                                           | 1.01 (0.36-2.90)  | 0.78 (0.12-5.72)  | 1.79 (0.89, 3.57) | 6.06 (3.25, 11.30) |
| <b>Cardiovascular disease mortality</b> |                                                                |                  |                   |                   |                   |                                             |                   |                   |                   |                    |
| Men                                     | 1                                                              | 1.99 (1.11-3.58) | 0.73 (0.10-5.27)  | 1.34 (0.79-2.26)  | 3.04 (1.22-7.56)  | 1                                           | 0.46 (0.07-3.38)  | 2.01 (0.28-15.81) | 1.26 (0.54-2.91)  | 3.32 (1.26-8.77)   |
| Women                                   | 1                                                              | 0.60 (0.24-1.47) | 0.43 (0.06-3.07)  | 1.35 (0.82-2.23)  | 1.40 (0.57-3.46)  | 1                                           | 2.01 (0.78-5.61)  | 3.43 (0.98-5.61)  | 0.61 (0.18-2.05)  | 2.87 (1.19-6.87)   |
| <b>Non cancer, non CV mortality</b>     |                                                                |                  |                   |                   |                   |                                             |                   |                   |                   |                    |
| Men                                     | 1                                                              | 1.12 (0.58-2.22) | 1.65 (0.52-5.24)  | 1.36 (0.84-2.21)  | 4.71 (2.43-9.12)  | 1                                           | 2.65 (1.17, 6.01) | -                 | 1.90 (1.00-3.59)  | 5.43 (2.77-10.63)  |
| Women                                   | 1                                                              | 0.31 (0.10-1.01) | 1.86 (0.75, 4.59) | 0.95 (0.55, 1.66) | 1.34 (0.58, 3.08) | 1                                           | 1.37 (0.41-4.66)  | 4.88 (1.62-14.73) | 1.64 (0.72-3.72)  | 2.05 (0.76-5.52)   |

Adjusted for age, frailty status, country of birth, smoking status, alcohol intake, education, hypertension, chronic kidney disease, diabetes



**eTable 8.** Association Between Waist Circumference Change Categories and Risk of Mortality (HR, 95% CI) Excluding the US

|                     | Within 5% change | 5-10% increase   | >10% increase    | 5-10% decrease   | >10% decrease    |
|---------------------|------------------|------------------|------------------|------------------|------------------|
| All-cause mortality |                  |                  |                  |                  |                  |
| Men                 | 1                | 1.17 (0.91-1.51) | 0.93 (0.58-1.50) | 1.19 (0.95-1.49) | 2.24 (1.62-3.09) |
| Women               | 1                | 0.65 (0.43-1.00) | 1.34 (0.78-2.29) | 1.32 (1.03-1.71) | 2.21 (1.59-3.07) |

US, United States; WC, waist circumference; Adjusted for age, frailty status, smoking status, alcohol intake, education, hypertension, chronic kidney disease, diabetes, interim hospitalisation status

**eTable 9.** Association Between Waist Circumference Change Categories and Risk of Mortality (HR, 95% CI) Excluding Those With Baseline Cognitive Impairment

|                     | Within 5% change | 5-10% increase   | >10% increase    | 5-10% decrease   | >10% decrease     |
|---------------------|------------------|------------------|------------------|------------------|-------------------|
| All-cause mortality |                  |                  |                  |                  |                   |
| Men                 | 1                | 1.10 (0.86-1.40) | 0.90 (0.57-1.42) | 1.13 (0.91-1.41) | 2.18 (1.61-2.98)  |
| Women               | 1                | 1.07 (0.83-1.39) | 0.87 (0.61-1.23) | 1.17 (0.93-1.48) | 1.35 (1.02, 1.79) |

WC, waist circumference; Adjusted for age, frailty status, country of birth, smoking status, alcohol intake, education, hypertension, chronic kidney disease, diabetes, interim hospitalisation status

**eTable 10.** Association Between Waist Circumference Change Categories and Risk of Mortality (HR, 95% CI) (Restricting the Analysis After AV3)

|                     | Within 5% change | 5-10% increase   | >10% increase    | 5-10% decrease   | >10% decrease     |
|---------------------|------------------|------------------|------------------|------------------|-------------------|
| All-cause mortality |                  |                  |                  |                  |                   |
| Men                 | 1                | 1.07 (0.81-1.40) | 0.77 (0.44-1.34) | 1.10 (0.86-1.40) | 1.76 (1.21, 2.58) |
| Women               | 1                | 1.18 (0.89-1.56) | 1.03 (0.70-1.50) | 1.06 (0.79-1.39) | 1.28 (0.92-1.80)  |

AV3, annual visit 3; WC, waist circumference; Adjusted for age, frailty status, country of birth, smoking status, alcohol intake, education, hypertension, chronic kidney disease, diabetes, interim hospitalisation status

**eTable 11.** Association Between Waist Circumference Change Categories and Risk of Mortality (HR, 95% CI) Stratified by Obesity Status

|                     | Non-obese (n=11669) |                  |                  |                  |                  | Obese (n=4832)   |                  |                  |                  |                  |
|---------------------|---------------------|------------------|------------------|------------------|------------------|------------------|------------------|------------------|------------------|------------------|
|                     | Within 5% change    | 5-10% increase   | >10% increase    | 5-10% decrease   | >10% decrease    | Within 5% change | 5-10% increase   | >10% increase    | 5-10% decrease   | >10% decrease    |
| All-cause mortality |                     |                  |                  |                  |                  |                  |                  |                  |                  |                  |
| Men                 | 1                   | 1.13 (0.85-1.50) | 0.96 (0.58-1.59) | 1.14 (0.89-1.48) | 2.37 (1.69-3.32) | 1                | 1.01 (0.62-1.66) | 0.70 (0.22-2.20) | 1.09 (0.70-1.69) | 1.54 (0.71-3.31) |
| Women               | 1                   | 1.13 (0.83-1.53) | 0.95 (0.64-1.43) | 1.22 (0.91-1.62) | 1.53 (1.10-2.11) | 1                | 0.97 (0.61-1.55) | 0.69 (0.32-1.49) | 1.11 (0.73-1.68) | 1.00 (0.56-1.79) |

WC, waist circumference; Adjusted for age, frailty status, country of birth, smoking status, alcohol intake, education, hypertension, chronic kidney disease, diabetes, interim hospitalisation status

**eTable 12.** Association Between Waist Circumference Change Categories and Risk of Mortality (HR, 95% CI) Stratified by Age at Recruitment

|                     | <75 years (n=9783) |                  |                  |                  |                  | ≥75 years (n=6740) |                   |                   |                  |                  |
|---------------------|--------------------|------------------|------------------|------------------|------------------|--------------------|-------------------|-------------------|------------------|------------------|
|                     | Within 5% change   | 5-10% increase   | >10% increase    | 5-10% decrease   | >10% decrease    | Within 5% change   | 5-10% increase    | >10% increase     | 5-10% decrease   | >10% decrease    |
| All-cause mortality |                    |                  |                  |                  |                  |                    |                   |                   |                  |                  |
| Men                 | 1                  | 1.16 (0.79-1.71) | 0.53 (0.20-1.42) | 1.03 (0.68-1.53) | 2.40 (1.45-3.96) | 1                  | 1.05 (0.77-1.44)  | 1.08 (0.64-1.82)  | 1.19 (0.92-1.54) | 2.05 (1.39-3.03) |
| Women               | 1                  | 1.11 (0.72-1.69) | 0.65 (0.33-1.30) | 1.22 (0.81-1.83) | 1.17 (0.65-2.08) | 1                  | 1.05 (0.78, 1.46) | 0.97 (0.64, 1.82) | 1.15 (0.86-1.54) | 1.41 (1.02-1.95) |

WC, waist circumference; Adjusted for age, frailty status, country of birth, smoking status, alcohol intake, education, hypertension, chronic kidney disease, diabetes, interim hospitalisation status

**eTable 13.** Association Between Waist Circumference Change Categories and Risk of Mortality (HR, 95% CI) Stratified by Interim Hospitalisation Status

|                     | Not hospitalized before annual visit 2 (n=13120) |                  |                  |                  |                  | Hospitalised before annual visit 2 (n=3403) |                  |                  |                  |                  |
|---------------------|--------------------------------------------------|------------------|------------------|------------------|------------------|---------------------------------------------|------------------|------------------|------------------|------------------|
|                     | Within 5% change                                 | 5-10% increase   | >10% increase    | 5-10% decrease   | >10% decrease    | Within 5% change                            | 5-10% increase   | >10% increase    | 5-10% decrease   | >10% decrease    |
| All-cause mortality |                                                  |                  |                  |                  |                  |                                             |                  |                  |                  |                  |
| Men                 | 1                                                | 1.19 (0.90-1.57) | 0.87 (0.50-1.52) | 0.91 (0.68-1.21) | 1.68 (1.10-2.55) | 1                                           | 0.89 (0.54-1.49) | 0.94 (0.42-2.15) | 1.52 (1.07-2.13) | 3.00 (1.89-4.71) |
| Women               | 1                                                | 1.01 (0.75-1.36) | 0.67 (0.43-1.04) | 1.21 (0.92-1.04) | 1.11 (0.78-1.57) | 1                                           | 1.24 (0.76-2.04) | 1.52 (0.85-2.74) | 1.06 (0.65-1.74) | 2.00 (1.22-3.23) |

WC, waist circumference; Adjusted for age, frailty status, country of birth, smoking status, alcohol intake, education, hypertension, chronic kidney disease, diabetes

**eTable 14.** Overview of Systematic Reviews and Cohort Studies Investigating the Association Between Weight Change in Kilogram, Body Mass Index, Waist Circumference and Mortality in Noninstitutionalized People

| Author, Year                                              | Study population                                                                                    | Study name                              | Exposure                                      | Findings related to mortality                                                                                                                                                                                                                                                              | Comments                                                                                                                                                            |
|-----------------------------------------------------------|-----------------------------------------------------------------------------------------------------|-----------------------------------------|-----------------------------------------------|--------------------------------------------------------------------------------------------------------------------------------------------------------------------------------------------------------------------------------------------------------------------------------------------|---------------------------------------------------------------------------------------------------------------------------------------------------------------------|
| Systematic reviews                                        |                                                                                                     |                                         |                                               |                                                                                                                                                                                                                                                                                            |                                                                                                                                                                     |
| Alharbi 2021 <sup>3</sup>                                 | 30 studies, including participants aged >65 years. Studies published before June 2020 were included | N/A                                     | Weight gain, weight loss, weight fluctuation  | <b>All-cause mortality:</b> Based on 30 studies weight loss was associated with a 59% increase risk. Based on 27 studies weight gain was associated with a 10% increase risk. Based on 4 studies weight fluctuation was associated with a 63% increased risk.                              | Only in 6 studies change in BMI was examined. In the rest of the studies change in weight (kg) was examined.<br><br>High heterogeneity between the included studies |
| Karahalios 2017 <sup>9</sup>                              | 26 studies including participants aged 40-65 years. Studies were published before September 2015    | N/A                                     | Weight gain and weight loss                   | <b>All-cause mortality:</b> Weight loss increased the risk by 45%. Weight gain was not associated.<br><br><b>Cancer mortality:</b> neither weight loss nor weight gain was associated.<br><br><b>CVD mortality:</b> Weight gain increased the risk by 21%. Weight loss was not associated. | High heterogeneity between the included studies.<br><br>Most studies examined weight change and, in a few studies, change in BMI was examined.                      |
| Cohort studies not included in the two systematic reviews |                                                                                                     |                                         |                                               |                                                                                                                                                                                                                                                                                            |                                                                                                                                                                     |
| Alharbi 2022 <sup>22</sup>                                | 1664 community-dwelling adults aged 65 years                                                        | Enquête de Santé Psychologique-Risques, | Weight change between 1999–2000 and 2003–2004 | <b>Cancer Mortality:</b> $\geq 5\%$ weight loss was not associated with cancer mortality                                                                                                                                                                                                   | Participants had several comorbidities i.e. 32% participants had depression                                                                                         |

| Author, Year                 | Study population                                                                                      | Study name                             | Exposure                                     | Findings related to mortality                                                                                                                                                                                                                                                             | Comments                                                                                                                                                            |
|------------------------------|-------------------------------------------------------------------------------------------------------|----------------------------------------|----------------------------------------------|-------------------------------------------------------------------------------------------------------------------------------------------------------------------------------------------------------------------------------------------------------------------------------------------|---------------------------------------------------------------------------------------------------------------------------------------------------------------------|
| Systematic reviews           |                                                                                                       |                                        |                                              |                                                                                                                                                                                                                                                                                           |                                                                                                                                                                     |
| Alharbi 2021 <sup>3</sup>    | 30 studies, including participants aged >65 years<br>Studies published before June 2020 were included | N/A                                    | Weight gain, weight loss, weight fluctuation | <b>All-cause mortality:</b> Based on 30 studies weight loss was associated with a 59% increase risk· Based on 27 studies weight gain was associated with a 10% increase risk·<br>Based on 4 studies weight fluctuation was associated with a 63% increased risk·                          | Only in 6 studies change in BMI was examined· In the rest of the studies change in weight (kg) was examined·<br><br>High heterogeneity between the included studies |
| Karahalios 2017 <sup>9</sup> | 26 studies including participants aged 40-65 years·<br>Studies were published before September 2015   | N/A                                    | Weight gain and weight loss                  | <b>All-cause mortality:</b> Weight loss increased the risk by 45%<br>Weight gain was not associated<br><br><b>Cancer mortality:</b> neither weight loss nor weight gain was associated<br><br><b>CVD mortality:</b> Weight gain increased the risk by 21%· Weight loss was not associated | High heterogeneity between the included studies<br><br>Most studies examined weight change and, in a few studies, change in BMI was examined·                       |
|                              |                                                                                                       | Incidence et Traitement (ESPRIT) study |                                              | <b>CVD mortality:</b> ≥5% weight loss was associated with higher CVD mortality (HR: 1.53, 95% CI: 1.10–2.14)                                                                                                                                                                              |                                                                                                                                                                     |
| Alharbi 2022 <sup>21</sup>   | 2,017 community-                                                                                      | Enquête de Santé Psychologique-        | Self-reported weight loss during             | <b>All-cause mortality:</b> Self-reported weight loss at baseline was not associated                                                                                                                                                                                                      | Participants had several comorbidities i.e. one in three had depression                                                                                             |



| Author, Year                 | Study population                                                                                      | Study name                                      | Exposure                                     | Findings related to mortality                                                                                                                                                                                                                                                             | Comments                                                                                                                                                            |
|------------------------------|-------------------------------------------------------------------------------------------------------|-------------------------------------------------|----------------------------------------------|-------------------------------------------------------------------------------------------------------------------------------------------------------------------------------------------------------------------------------------------------------------------------------------------|---------------------------------------------------------------------------------------------------------------------------------------------------------------------|
| Systematic reviews           |                                                                                                       |                                                 |                                              |                                                                                                                                                                                                                                                                                           |                                                                                                                                                                     |
| Alharbi 2021 <sup>3</sup>    | 30 studies, including participants aged >65 years<br>Studies published before June 2020 were included | N/A                                             | Weight gain, weight loss, weight fluctuation | <b>All-cause mortality:</b> Based on 30 studies weight loss was associated with a 59% increase risk· Based on 27 studies weight gain was associated with a 10% increase risk·<br>Based on 4 studies weight fluctuation was associated with a 63% increased risk·                          | Only in 6 studies change in BMI was examined· In the rest of the studies change in weight (kg) was examined·<br><br>High heterogeneity between the included studies |
| Karahalios 2017 <sup>9</sup> | 26 studies including participants aged 40-65 years·<br>Studies were published before September 2015   | N/A                                             | Weight gain and weight loss                  | <b>All-cause mortality:</b> Weight loss increased the risk by 45%<br>Weight gain was not associated<br><br><b>Cancer mortality:</b> neither weight loss nor weight gain was associated<br><br><b>CVD mortality:</b> Weight gain increased the risk by 21%· Weight loss was not associated | High heterogeneity between the included studies<br><br>Most studies examined weight change and, in a few studies, change in BMI was examined·                       |
|                              | dwelling adults aged 65 years                                                                         | Risques, Incidence et Traitement (ESPRIT) study | face-to-face interviews·                     | with an increased mortality risk after adjusting for health and lifestyle factors· In men, a baseline self-reported recent weight loss of >3 kg was associated with a 52% increase in mortality risk                                                                                      |                                                                                                                                                                     |

| Author, Year                 | Study population                                                                                     | Study name                                                     | Exposure                                                                                                                                      | Findings related to mortality                                                                                                                                                                                                                                                              | Comments                                                                                                                                                                      |
|------------------------------|------------------------------------------------------------------------------------------------------|----------------------------------------------------------------|-----------------------------------------------------------------------------------------------------------------------------------------------|--------------------------------------------------------------------------------------------------------------------------------------------------------------------------------------------------------------------------------------------------------------------------------------------|-------------------------------------------------------------------------------------------------------------------------------------------------------------------------------|
| Systematic reviews           |                                                                                                      |                                                                |                                                                                                                                               |                                                                                                                                                                                                                                                                                            |                                                                                                                                                                               |
| Alharbi 2021 <sup>3</sup>    | 30 studies, including participants aged >65 years. Studies published before June 2020 were included. | N/A                                                            | Weight gain, weight loss, weight fluctuation                                                                                                  | <b>All-cause mortality:</b> Based on 30 studies weight loss was associated with a 59% increase risk. Based on 27 studies weight gain was associated with a 10% increase risk. Based on 4 studies weight fluctuation was associated with a 63% increased risk.                              | Only in 6 studies change in BMI was examined. In the rest of the studies change in weight (kg) was examined.<br><br>High heterogeneity between the included studies           |
| Karahalios 2017 <sup>9</sup> | 26 studies including participants aged 40-65 years. Studies were published before September 2015.    | N/A                                                            | Weight gain and weight loss                                                                                                                   | <b>All-cause mortality:</b> Weight loss increased the risk by 45%. Weight gain was not associated.<br><br><b>Cancer mortality:</b> neither weight loss nor weight gain was associated.<br><br><b>CVD mortality:</b> Weight gain increased the risk by 21%. Weight loss was not associated. | High heterogeneity between the included studies.<br><br>Most studies examined weight change and, in a few studies, change in BMI was examined.                                |
| Okada 2021 <sup>10</sup>     | 69,681 participants aged 40-79 years                                                                 | Japan Collaborative Cohort Study for Evaluation of Cancer Risk | Weight change in kg calculated from recalled weight at age 20 and measured weight at baseline. 11 weight change categories: weight loss >12.5 | <b>CVD mortality:</b> Any weight loss was associated with increased risk; only >12.5 kg weight gain was associated with increased risk.                                                                                                                                                    | People in the weight loss group were older than those in the weight gain group. For example, mean age of weight loss >12.5 kg vs weight gain >12.5 kg was 65.5 vs 54.6 years. |

| Author, Year                 | Study population                                                                                      | Study name | Exposure                                                                                                                             | Findings related to mortality                                                                                                                                                                                                                                                             | Comments                                                                                                                                                            |
|------------------------------|-------------------------------------------------------------------------------------------------------|------------|--------------------------------------------------------------------------------------------------------------------------------------|-------------------------------------------------------------------------------------------------------------------------------------------------------------------------------------------------------------------------------------------------------------------------------------------|---------------------------------------------------------------------------------------------------------------------------------------------------------------------|
| Systematic reviews           |                                                                                                       |            |                                                                                                                                      |                                                                                                                                                                                                                                                                                           |                                                                                                                                                                     |
| Alharbi 2021 <sup>3</sup>    | 30 studies, including participants aged >65 years<br>Studies published before June 2020 were included | N/A        | Weight gain, weight loss, weight fluctuation                                                                                         | <b>All-cause mortality:</b> Based on 30 studies weight loss was associated with a 59% increase risk· Based on 27 studies weight gain was associated with a 10% increase risk·<br>Based on 4 studies weight fluctuation was associated with a 63% increased risk·                          | Only in 6 studies change in BMI was examined· In the rest of the studies change in weight (kg) was examined·<br><br>High heterogeneity between the included studies |
| Karahalios 2017 <sup>9</sup> | 26 studies including participants aged 40-65 years·<br>Studies were published before September 2015   | N/A        | Weight gain and weight loss                                                                                                          | <b>All-cause mortality:</b> Weight loss increased the risk by 45%<br>Weight gain was not associated<br><br><b>Cancer mortality:</b> neither weight loss nor weight gain was associated<br><br><b>CVD mortality:</b> Weight gain increased the risk by 21%· Weight loss was not associated | High heterogeneity between the included studies<br><br>Most studies examined weight change and, in a few studies, change in BMI was examined·                       |
|                              |                                                                                                       |            | kg, 10-12·4 kg, 7·5 to 9·9 kg, 5-7·4 kg, 2·5-4·9 kg;<br>Stable weight within 2·4 kg change;<br>Weight gain >12·5 kg, 10-12·4 kg, 7·5 |                                                                                                                                                                                                                                                                                           |                                                                                                                                                                     |

| Author, Year                 | Study population                                                                                      | Study name                         | Exposure                                                                                          | Findings related to mortality                                                                                                                                                                                                                                                              | Comments                                                                                                                                                            |
|------------------------------|-------------------------------------------------------------------------------------------------------|------------------------------------|---------------------------------------------------------------------------------------------------|--------------------------------------------------------------------------------------------------------------------------------------------------------------------------------------------------------------------------------------------------------------------------------------------|---------------------------------------------------------------------------------------------------------------------------------------------------------------------|
| Systematic reviews           |                                                                                                       |                                    |                                                                                                   |                                                                                                                                                                                                                                                                                            |                                                                                                                                                                     |
| Alharbi 2021 <sup>3</sup>    | 30 studies, including participants aged >65 years<br>Studies published before June 2020 were included | N/A                                | Weight gain, weight loss, weight fluctuation                                                      | <b>All-cause mortality:</b> Based on 30 studies weight loss was associated with a 59% increase risk. Based on 27 studies weight gain was associated with a 10% increase risk. Based on 4 studies weight fluctuation was associated with a 63% increased risk.                              | Only in 6 studies change in BMI was examined. In the rest of the studies change in weight (kg) was examined.<br><br>High heterogeneity between the included studies |
| Karahalios 2017 <sup>9</sup> | 26 studies including participants aged 40-65 years. Studies were published before September 2015      | N/A                                | Weight gain and weight loss                                                                       | <b>All-cause mortality:</b> Weight loss increased the risk by 45%. Weight gain was not associated.<br><br><b>Cancer mortality:</b> neither weight loss nor weight gain was associated.<br><br><b>CVD mortality:</b> Weight gain increased the risk by 21%. Weight loss was not associated. | High heterogeneity between the included studies<br><br>Most studies examined weight change and, in a few studies, change in BMI was examined.                       |
|                              |                                                                                                       |                                    | to 9.9 kg, 5-7.4 kg, 2.5-4.9 kg                                                                   |                                                                                                                                                                                                                                                                                            |                                                                                                                                                                     |
| Suh 2021 <sup>11</sup>       | 10,254 participants aged >45 years                                                                    | Korean Longitudinal Study of Aging | Weight change from 2006 to 2008. 3 weight change categories: within 5 kg weight change ('stable', | <b>All-cause mortality:</b> >5 kg weight loss increased the risk by 62% in participants aged 45-65 years, and by 56% in participants older than 65                                                                                                                                         |                                                                                                                                                                     |

| Author, Year                 | Study population                                                                                     | Study name                           | Exposure                                                          | Findings related to mortality                                                                                                                                                                                                                                                              | Comments                                                                                                                                                            |
|------------------------------|------------------------------------------------------------------------------------------------------|--------------------------------------|-------------------------------------------------------------------|--------------------------------------------------------------------------------------------------------------------------------------------------------------------------------------------------------------------------------------------------------------------------------------------|---------------------------------------------------------------------------------------------------------------------------------------------------------------------|
| Systematic reviews           |                                                                                                      |                                      |                                                                   |                                                                                                                                                                                                                                                                                            |                                                                                                                                                                     |
| Alharbi 2021 <sup>3</sup>    | 30 studies, including participants aged >65 years. Studies published before June 2020 were included. | N/A                                  | Weight gain, weight loss, weight fluctuation                      | <b>All-cause mortality:</b> Based on 30 studies weight loss was associated with a 59% increase risk. Based on 27 studies weight gain was associated with a 10% increase risk. Based on 4 studies weight fluctuation was associated with a 63% increased risk.                              | Only in 6 studies change in BMI was examined. In the rest of the studies change in weight (kg) was examined.<br><br>High heterogeneity between the included studies |
| Karahalios 2017 <sup>9</sup> | 26 studies including participants aged 40-65 years. Studies were published before September 2015.    | N/A                                  | Weight gain and weight loss                                       | <b>All-cause mortality:</b> Weight loss increased the risk by 45%. Weight gain was not associated.<br><br><b>Cancer mortality:</b> neither weight loss nor weight gain was associated.<br><br><b>CVD mortality:</b> Weight gain increased the risk by 21%. Weight loss was not associated. | High heterogeneity between the included studies.<br><br>Most studies examined weight change and, in a few studies, change in BMI was examined.                      |
|                              |                                                                                                      |                                      | reference category), weight gain >5 kg, and weight loss >5 kg.    | years. Weight gain was not associated with the risk                                                                                                                                                                                                                                        |                                                                                                                                                                     |
| Son 2020 <sup>12</sup>       | 100256 participants aged >65 years                                                                   | Data from the Korean National Health | Weight change over 4 years. 3 weight categories: weight loss >5%, | <b>All-cause mortality:</b> Weight loss increased the rate by 68%, whereas weight gain increased the rate by 10%.                                                                                                                                                                          | In subgroup analysis, for participants who were underweight at baseline,                                                                                            |

| Author, Year                 | Study population                                                                                      | Study name                     | Exposure                                                      | Findings related to mortality                                                                                                                                                                                                                                                              | Comments                                                                                                                                                            |
|------------------------------|-------------------------------------------------------------------------------------------------------|--------------------------------|---------------------------------------------------------------|--------------------------------------------------------------------------------------------------------------------------------------------------------------------------------------------------------------------------------------------------------------------------------------------|---------------------------------------------------------------------------------------------------------------------------------------------------------------------|
| Systematic reviews           |                                                                                                       |                                |                                                               |                                                                                                                                                                                                                                                                                            |                                                                                                                                                                     |
| Alharbi 2021 <sup>3</sup>    | 30 studies, including participants aged >65 years<br>Studies published before June 2020 were included | N/A                            | Weight gain, weight loss, weight fluctuation                  | <b>All-cause mortality:</b> Based on 30 studies weight loss was associated with a 59% increase risk. Based on 27 studies weight gain was associated with a 10% increase risk. Based on 4 studies weight fluctuation was associated with a 63% increased risk.                              | Only in 6 studies change in BMI was examined. In the rest of the studies change in weight (kg) was examined.<br><br>High heterogeneity between the included studies |
| Karahalios 2017 <sup>9</sup> | 26 studies including participants aged 40-65 years. Studies were published before September 2015      | N/A                            | Weight gain and weight loss                                   | <b>All-cause mortality:</b> Weight loss increased the risk by 45%. Weight gain was not associated.<br><br><b>Cancer mortality:</b> neither weight loss nor weight gain was associated.<br><br><b>CVD mortality:</b> Weight gain increased the risk by 21%. Weight loss was not associated. | High heterogeneity between the included studies<br><br>Most studies examined weight change and, in a few studies, change in BMI was examined.                       |
|                              |                                                                                                       | Insurance Corporation records  | stable weight within 5% weight change, weight gain >5%        |                                                                                                                                                                                                                                                                                            | current cigarette smokers or heavy alcohol drinkers, weight gain did not increase the mortality rate.                                                               |
| Huang 2020 <sup>13</sup>     | 17773 participants aged >50 years                                                                     | Guangzhou Biobank Cohort Study | Change in BMI and WC were calculated between 2003-8 and 2008- | <b>All-cause mortality:</b> >5% BMI loss and >5% WC loss increased the risk                                                                                                                                                                                                                |                                                                                                                                                                     |

| Author, Year                 | Study population                                                                                     | Study name | Exposure                                                                                                    | Findings related to mortality                                                                                                                                                                                                                                                              | Comments                                                                                                                                                            |
|------------------------------|------------------------------------------------------------------------------------------------------|------------|-------------------------------------------------------------------------------------------------------------|--------------------------------------------------------------------------------------------------------------------------------------------------------------------------------------------------------------------------------------------------------------------------------------------|---------------------------------------------------------------------------------------------------------------------------------------------------------------------|
| Systematic reviews           |                                                                                                      |            |                                                                                                             |                                                                                                                                                                                                                                                                                            |                                                                                                                                                                     |
| Alharbi 2021 <sup>3</sup>    | 30 studies, including participants aged >65 years. Studies published before June 2020 were included. | N/A        | Weight gain, weight loss, weight fluctuation                                                                | <b>All-cause mortality:</b> Based on 30 studies weight loss was associated with a 59% increase risk. Based on 27 studies weight gain was associated with a 10% increase risk. Based on 4 studies weight fluctuation was associated with a 63% increased risk.                              | Only in 6 studies change in BMI was examined. In the rest of the studies change in weight (kg) was examined.<br><br>High heterogeneity between the included studies |
| Karahalios 2017 <sup>9</sup> | 26 studies including participants aged 40-65 years. Studies were published before September 2015.    | N/A        | Weight gain and weight loss                                                                                 | <b>All-cause mortality:</b> Weight loss increased the risk by 45%. Weight gain was not associated.<br><br><b>Cancer mortality:</b> neither weight loss nor weight gain was associated.<br><br><b>CVD mortality:</b> Weight gain increased the risk by 21%. Weight loss was not associated. | High heterogeneity between the included studies.<br><br>Most studies examined weight change and, in a few studies, change in BMI was examined.                      |
|                              |                                                                                                      |            | 12 surveys. 3 groups: >5% BMI loss, within 5% BMI change (stable), and >5% BMI gain. Similar classification | <b>CVD mortality:</b> >5% BMI loss and >5% WC loss increased the risk.<br><b>Cancer mortality:</b> >5% decrease in BMI increased the risk. No association for WC was observed.                                                                                                             |                                                                                                                                                                     |

| Author, Year                 | Study population                                                                                      | Study name | Exposure                                                                                     | Findings related to mortality                                                                                                                                                                                                                                                              | Comments                                                                                                                                                            |
|------------------------------|-------------------------------------------------------------------------------------------------------|------------|----------------------------------------------------------------------------------------------|--------------------------------------------------------------------------------------------------------------------------------------------------------------------------------------------------------------------------------------------------------------------------------------------|---------------------------------------------------------------------------------------------------------------------------------------------------------------------|
| Systematic reviews           |                                                                                                       |            |                                                                                              |                                                                                                                                                                                                                                                                                            |                                                                                                                                                                     |
| Alharbi 2021 <sup>3</sup>    | 30 studies, including participants aged >65 years<br>Studies published before June 2020 were included | N/A        | Weight gain, weight loss, weight fluctuation                                                 | <b>All-cause mortality:</b> Based on 30 studies weight loss was associated with a 59% increase risk. Based on 27 studies weight gain was associated with a 10% increase risk. Based on 4 studies weight fluctuation was associated with a 63% increased risk.                              | Only in 6 studies change in BMI was examined. In the rest of the studies change in weight (kg) was examined.<br><br>High heterogeneity between the included studies |
| Karahalios 2017 <sup>9</sup> | 26 studies including participants aged 40-65 years. Studies were published before September 2015      | N/A        | Weight gain and weight loss                                                                  | <b>All-cause mortality:</b> Weight loss increased the risk by 45%. Weight gain was not associated.<br><br><b>Cancer mortality:</b> neither weight loss nor weight gain was associated.<br><br><b>CVD mortality:</b> Weight gain increased the risk by 21%. Weight loss was not associated. | High heterogeneity between the included studies<br><br>Most studies examined weight change and, in a few studies, change in BMI was examined.                       |
|                              |                                                                                                       |            | applied for WC change                                                                        |                                                                                                                                                                                                                                                                                            |                                                                                                                                                                     |
| Nishida 2019 <sup>14</sup>   | 1229 community-dwelling older adults aged >65 years                                                   |            | Weight data was extracted from health check-up records of 2011 and 2013. 3 categories: >4.8% | <b>All-cause mortality</b><br>Only weight loss was associated with increased risk.                                                                                                                                                                                                         |                                                                                                                                                                     |



| Author, Year                 | Study population                                                                                      | Study name    | Exposure                                                                                    | Findings related to mortality                                                                                                                                                                                                                                                             | Comments                                                                                                                                                            |
|------------------------------|-------------------------------------------------------------------------------------------------------|---------------|---------------------------------------------------------------------------------------------|-------------------------------------------------------------------------------------------------------------------------------------------------------------------------------------------------------------------------------------------------------------------------------------------|---------------------------------------------------------------------------------------------------------------------------------------------------------------------|
| Systematic reviews           |                                                                                                       |               |                                                                                             |                                                                                                                                                                                                                                                                                           |                                                                                                                                                                     |
| Alharbi 2021 <sup>3</sup>    | 30 studies, including participants aged >65 years<br>Studies published before June 2020 were included | N/A           | Weight gain, weight loss, weight fluctuation                                                | <b>All-cause mortality:</b> Based on 30 studies weight loss was associated with a 59% increase risk· Based on 27 studies weight gain was associated with a 10% increase risk·<br>Based on 4 studies weight fluctuation was associated with a 63% increased risk·                          | Only in 6 studies change in BMI was examined· In the rest of the studies change in weight (kg) was examined·<br><br>High heterogeneity between the included studies |
| Karahalios 2017 <sup>9</sup> | 26 studies including participants aged 40-65 years·<br>Studies were published before September 2015   | N/A           | Weight gain and weight loss                                                                 | <b>All-cause mortality:</b> Weight loss increased the risk by 45%<br>Weight gain was not associated<br><br><b>Cancer mortality:</b> neither weight loss nor weight gain was associated<br><br><b>CVD mortality:</b> Weight gain increased the risk by 21%· Weight loss was not associated | High heterogeneity between the included studies<br><br>Most studies examined weight change and, in a few studies, change in BMI was examined·                       |
|                              |                                                                                                       |               | weight loss, stable weight (between a 4·8% decrease and a 3·1% increase), >3·1% weight gain |                                                                                                                                                                                                                                                                                           |                                                                                                                                                                     |
| Chen 2019 <sup>15</sup>      | 36051 participants                                                                                    | NHANES survey | Weight change between 10 years                                                              | <b>All-cause mortality:</b> weight loss and >20 kg weight gain                                                                                                                                                                                                                            | Participants in the obese to non-obese group was older than those                                                                                                   |

| Author, Year                 | Study population                                                                                      | Study name | Exposure                                                                                                                 | Findings related to mortality                                                                                                                                                                                                                                                              | Comments                                                                                                                                                            |
|------------------------------|-------------------------------------------------------------------------------------------------------|------------|--------------------------------------------------------------------------------------------------------------------------|--------------------------------------------------------------------------------------------------------------------------------------------------------------------------------------------------------------------------------------------------------------------------------------------|---------------------------------------------------------------------------------------------------------------------------------------------------------------------|
| Systematic reviews           |                                                                                                       |            |                                                                                                                          |                                                                                                                                                                                                                                                                                            |                                                                                                                                                                     |
| Alharbi 2021 <sup>3</sup>    | 30 studies, including participants aged >65 years<br>Studies published before June 2020 were included | N/A        | Weight gain, weight loss, weight fluctuation                                                                             | <b>All-cause mortality:</b> Based on 30 studies weight loss was associated with a 59% increase risk. Based on 27 studies weight gain was associated with a 10% increase risk. Based on 4 studies weight fluctuation was associated with a 63% increased risk.                              | Only in 6 studies change in BMI was examined. In the rest of the studies change in weight (kg) was examined.<br><br>High heterogeneity between the included studies |
| Karahalios 2017 <sup>9</sup> | 26 studies including participants aged 40-65 years. Studies were published before September 2015      | N/A        | Weight gain and weight loss                                                                                              | <b>All-cause mortality:</b> Weight loss increased the risk by 45%. Weight gain was not associated.<br><br><b>Cancer mortality:</b> neither weight loss nor weight gain was associated.<br><br><b>CVD mortality:</b> Weight gain increased the risk by 21%. Weight loss was not associated. | High heterogeneity between the included studies<br><br>Most studies examined weight change and, in a few studies, change in BMI was examined.                       |
|                              | aged >=40 years                                                                                       |            | before baseline (recalled weight) and baseline (measured weight). 5 weight change categories: Weight loss >2.5kg, Stable | was related with increased risk, xx%?<br><br><b>CVD mortality:</b> An obese to non-obese weight change pattern from middle to late adulthood was associated with increased risk.                                                                                                           | who were stable normal or stable obesity category<br>Mean (95% CI) age 59.9 (58.3 to 61.5) vs 56.8 (56.2 to 57.4) vs 53.5 (52.8 to 54.2)                            |

| Author, Year                 | Study population                                                                                      | Study name | Exposure                                                                                                                 | Findings related to mortality                                                                                                                                                                                                                                                             | Comments                                                                                                                                                            |
|------------------------------|-------------------------------------------------------------------------------------------------------|------------|--------------------------------------------------------------------------------------------------------------------------|-------------------------------------------------------------------------------------------------------------------------------------------------------------------------------------------------------------------------------------------------------------------------------------------|---------------------------------------------------------------------------------------------------------------------------------------------------------------------|
| Systematic reviews           |                                                                                                       |            |                                                                                                                          |                                                                                                                                                                                                                                                                                           |                                                                                                                                                                     |
| Alharbi 2021 <sup>3</sup>    | 30 studies, including participants aged >65 years<br>Studies published before June 2020 were included | N/A        | Weight gain, weight loss, weight fluctuation                                                                             | <b>All-cause mortality:</b> Based on 30 studies weight loss was associated with a 59% increase risk· Based on 27 studies weight gain was associated with a 10% increase risk·<br>Based on 4 studies weight fluctuation was associated with a 63% increased risk·                          | Only in 6 studies change in BMI was examined· In the rest of the studies change in weight (kg) was examined·<br><br>High heterogeneity between the included studies |
| Karahalios 2017 <sup>9</sup> | 26 studies including participants aged 40-65 years·<br>Studies were published before September 2015   | N/A        | Weight gain and weight loss                                                                                              | <b>All-cause mortality:</b> Weight loss increased the risk by 45%<br>Weight gain was not associated<br><br><b>Cancer mortality:</b> neither weight loss nor weight gain was associated<br><br><b>CVD mortality:</b> Weight gain increased the risk by 21%· Weight loss was not associated | High heterogeneity between the included studies<br><br>Most studies examined weight change and, in a few studies, change in BMI was examined·                       |
|                              |                                                                                                       |            | weight within 2.5 kg change (reference)<br>Weight gain >2.5-10 kg, >10-20 kg, >20 kg<br>BMI categories:<br>stable normal |                                                                                                                                                                                                                                                                                           |                                                                                                                                                                     |

| Author, Year                 | Study population                                                                                      | Study name | Exposure                                                                                                                                        | Findings related to mortality                                                                                                                                                                                                                                                             | Comments                                                                                                                                                            |
|------------------------------|-------------------------------------------------------------------------------------------------------|------------|-------------------------------------------------------------------------------------------------------------------------------------------------|-------------------------------------------------------------------------------------------------------------------------------------------------------------------------------------------------------------------------------------------------------------------------------------------|---------------------------------------------------------------------------------------------------------------------------------------------------------------------|
| Systematic reviews           |                                                                                                       |            |                                                                                                                                                 |                                                                                                                                                                                                                                                                                           |                                                                                                                                                                     |
| Alharbi 2021 <sup>3</sup>    | 30 studies, including participants aged >65 years<br>Studies published before June 2020 were included | N/A        | Weight gain, weight loss, weight fluctuation                                                                                                    | <b>All-cause mortality:</b> Based on 30 studies weight loss was associated with a 59% increase risk· Based on 27 studies weight gain was associated with a 10% increase risk·<br>Based on 4 studies weight fluctuation was associated with a 63% increased risk·                          | Only in 6 studies change in BMI was examined· In the rest of the studies change in weight (kg) was examined·<br><br>High heterogeneity between the included studies |
| Karahalios 2017 <sup>9</sup> | 26 studies including participants aged 40-65 years·<br>Studies were published before September 2015   | N/A        | Weight gain and weight loss                                                                                                                     | <b>All-cause mortality:</b> Weight loss increased the risk by 45%<br>Weight gain was not associated<br><br><b>Cancer mortality:</b> neither weight loss nor weight gain was associated<br><br><b>CVD mortality:</b> Weight gain increased the risk by 21%· Weight loss was not associated | High heterogeneity between the included studies<br><br>Most studies examined weight change and, in a few studies, change in BMI was examined·                       |
|                              |                                                                                                       |            | (<25·0 kg/m <sup>2</sup> at both times), maximum overweight (25·0-29·9 kg/m <sup>2</sup> at either time but not ≥30·0 at the other time), obese |                                                                                                                                                                                                                                                                                           |                                                                                                                                                                     |

| Author, Year                 | Study population                                                                                     | Study name | Exposure                                                                                                                                               | Findings related to mortality                                                                                                                                                                                                                                                              | Comments                                                                                                                                                            |
|------------------------------|------------------------------------------------------------------------------------------------------|------------|--------------------------------------------------------------------------------------------------------------------------------------------------------|--------------------------------------------------------------------------------------------------------------------------------------------------------------------------------------------------------------------------------------------------------------------------------------------|---------------------------------------------------------------------------------------------------------------------------------------------------------------------|
| Systematic reviews           |                                                                                                      |            |                                                                                                                                                        |                                                                                                                                                                                                                                                                                            |                                                                                                                                                                     |
| Alharbi 2021 <sup>3</sup>    | 30 studies, including participants aged >65 years. Studies published before June 2020 were included. | N/A        | Weight gain, weight loss, weight fluctuation                                                                                                           | <b>All-cause mortality:</b> Based on 30 studies weight loss was associated with a 59% increase risk. Based on 27 studies weight gain was associated with a 10% increase risk. Based on 4 studies weight fluctuation was associated with a 63% increased risk.                              | Only in 6 studies change in BMI was examined. In the rest of the studies change in weight (kg) was examined.<br><br>High heterogeneity between the included studies |
| Karahalios 2017 <sup>9</sup> | 26 studies including participants aged 40-65 years. Studies were published before September 2015.    | N/A        | Weight gain and weight loss                                                                                                                            | <b>All-cause mortality:</b> Weight loss increased the risk by 45%. Weight gain was not associated.<br><br><b>Cancer mortality:</b> neither weight loss nor weight gain was associated.<br><br><b>CVD mortality:</b> Weight gain increased the risk by 21%. Weight loss was not associated. | High heterogeneity between the included studies.<br><br>Most studies examined weight change and, in a few studies, change in BMI was examined.                      |
|                              |                                                                                                      |            | to non-obese ( $\geq 30.0$ at younger age and $< 30.0$ later), non-obese to obese ( $< 30.0$ at younger age and $\geq 30.0$ later), and stable obesity |                                                                                                                                                                                                                                                                                            |                                                                                                                                                                     |

| Author, Year                 | Study population                                                                                      | Study name                             | Exposure                                               | Findings related to mortality                                                                                                                                                                                                                                                              | Comments                                                                                                                                                            |
|------------------------------|-------------------------------------------------------------------------------------------------------|----------------------------------------|--------------------------------------------------------|--------------------------------------------------------------------------------------------------------------------------------------------------------------------------------------------------------------------------------------------------------------------------------------------|---------------------------------------------------------------------------------------------------------------------------------------------------------------------|
| Systematic reviews           |                                                                                                       |                                        |                                                        |                                                                                                                                                                                                                                                                                            |                                                                                                                                                                     |
| Alharbi 2021 <sup>3</sup>    | 30 studies, including participants aged >65 years<br>Studies published before June 2020 were included | N/A                                    | Weight gain, weight loss, weight fluctuation           | <b>All-cause mortality:</b> Based on 30 studies weight loss was associated with a 59% increase risk. Based on 27 studies weight gain was associated with a 10% increase risk. Based on 4 studies weight fluctuation was associated with a 63% increased risk.                              | Only in 6 studies change in BMI was examined. In the rest of the studies change in weight (kg) was examined.<br><br>High heterogeneity between the included studies |
| Karahalios 2017 <sup>9</sup> | 26 studies including participants aged 40-65 years. Studies were published before September 2015      | N/A                                    | Weight gain and weight loss                            | <b>All-cause mortality:</b> Weight loss increased the risk by 45%. Weight gain was not associated.<br><br><b>Cancer mortality:</b> neither weight loss nor weight gain was associated.<br><br><b>CVD mortality:</b> Weight gain increased the risk by 21%. Weight loss was not associated. | High heterogeneity between the included studies<br><br>Most studies examined weight change and, in a few studies, change in BMI was examined.                       |
|                              |                                                                                                       |                                        | (≥30.0 at both times).                                 |                                                                                                                                                                                                                                                                                            |                                                                                                                                                                     |
| Park 2018 <sup>16</sup>      | 63,040 participants aged 45-75 years                                                                  | The Multiethnic Cohort Study 7.3 years | Weight change from baseline to 10 years, 7 categories: | <b>All-cause mortality:</b> any weight loss and >10kg weight gain increased the risk                                                                                                                                                                                                       | Data for all-cause mortality for the 65-75 years old people was extractable.                                                                                        |

| Author, Year                 | Study population                                                                                      | Study name | Exposure                                                                                                                       | Findings related to mortality                                                                                                                                                                                                                                                              | Comments                                                                                                                                                                                    |
|------------------------------|-------------------------------------------------------------------------------------------------------|------------|--------------------------------------------------------------------------------------------------------------------------------|--------------------------------------------------------------------------------------------------------------------------------------------------------------------------------------------------------------------------------------------------------------------------------------------|---------------------------------------------------------------------------------------------------------------------------------------------------------------------------------------------|
| Systematic reviews           |                                                                                                       |            |                                                                                                                                |                                                                                                                                                                                                                                                                                            |                                                                                                                                                                                             |
| Alharbi 2021 <sup>3</sup>    | 30 studies, including participants aged >65 years<br>Studies published before June 2020 were included | N/A        | Weight gain, weight loss, weight fluctuation                                                                                   | <b>All-cause mortality:</b> Based on 30 studies weight loss was associated with a 59% increase risk. Based on 27 studies weight gain was associated with a 10% increase risk. Based on 4 studies weight fluctuation was associated with a 63% increased risk.                              | Only in 6 studies change in BMI was examined. In the rest of the studies change in weight (kg) was examined.<br><br>High heterogeneity between the included studies                         |
| Karahalios 2017 <sup>9</sup> | 26 studies including participants aged 40-65 years. Studies were published before September 2015      | N/A        | Weight gain and weight loss                                                                                                    | <b>All-cause mortality:</b> Weight loss increased the risk by 45%. Weight gain was not associated.<br><br><b>Cancer mortality:</b> neither weight loss nor weight gain was associated.<br><br><b>CVD mortality:</b> Weight gain increased the risk by 21%. Weight loss was not associated. | High heterogeneity between the included studies<br><br>Most studies examined weight change and, in a few studies, change in BMI was examined.                                               |
|                              |                                                                                                       |            | Weight loss: >10 kg, >5-10 kg, >2.5-5 kg,<br>Stable weight $\pm$ 2.5 kg (reference)<br>Weight gain >2.5-5 kg, >5-10 kg, >10 kg | <b>CVD mortality:</b> any weight loss and >10kg weight gain increased the risk<br><br><b>Cancer mortality:</b> any weight loss but no weight gain was associated with increased risk                                                                                                       | People who gained weight were relatively younger than people who lost weight<br>Mean (SD) age of participants with 10 kg weight loss vs 10 kg weight gain: 59.6 $\pm$ 8.5 vs 52.7 $\pm$ 6.6 |

| Author, Year                 | Study population                                                                                      | Study name                                                                            | Exposure                                                                                                                  | Findings related to mortality                                                                                                                                                                                                                                                              | Comments                                                                                                                                                                   |
|------------------------------|-------------------------------------------------------------------------------------------------------|---------------------------------------------------------------------------------------|---------------------------------------------------------------------------------------------------------------------------|--------------------------------------------------------------------------------------------------------------------------------------------------------------------------------------------------------------------------------------------------------------------------------------------|----------------------------------------------------------------------------------------------------------------------------------------------------------------------------|
| Systematic reviews           |                                                                                                       |                                                                                       |                                                                                                                           |                                                                                                                                                                                                                                                                                            |                                                                                                                                                                            |
| Alharbi 2021 <sup>3</sup>    | 30 studies, including participants aged >65 years<br>Studies published before June 2020 were included | N/A                                                                                   | Weight gain, weight loss, weight fluctuation                                                                              | <b>All-cause mortality:</b> Based on 30 studies weight loss was associated with a 59% increase risk. Based on 27 studies weight gain was associated with a 10% increase risk. Based on 4 studies weight fluctuation was associated with a 63% increased risk.                              | Only in 6 studies change in BMI was examined. In the rest of the studies change in weight (kg) was examined.<br><br>High heterogeneity between the included studies        |
| Karahalios 2017 <sup>9</sup> | 26 studies including participants aged 40-65 years. Studies were published before September 2015      | N/A                                                                                   | Weight gain and weight loss                                                                                               | <b>All-cause mortality:</b> Weight loss increased the risk by 45%. Weight gain was not associated.<br><br><b>Cancer mortality:</b> neither weight loss nor weight gain was associated.<br><br><b>CVD mortality:</b> Weight gain increased the risk by 21%. Weight loss was not associated. | High heterogeneity between the included studies<br><br>Most studies examined weight change and, in a few studies, change in BMI was examined.                              |
| Mulligan 2018 <sup>17</sup>  | 12,580 participants, aged 39-78 years                                                                 | European Prospective Investigation into Cancer in Norfolk (EPIC-Norfolk) cohort Study | Weight change calculated between 1993-1997 and 1998-2000 surveys. 5 categories: weight loss >5kg, 2.5-5 kg, stable weight | <b>Men</b><br><b>All-cause mortality:</b> any weight loss increased risk<br><b>Cancer mortality:</b> no association<br><b>CVD mortality:</b> any weight loss increased risk                                                                                                                | Participants in the weight loss group were older than weight gain group. For example, mean (SD) age of weight loss >5 kg vs weight gain >5 kg was 60.5 (9.2) vs 55.9 (8.7) |



| Author, Year                 | Study population                                                                                      | Study name | Exposure                                     | Findings related to mortality                                                                                                                                                                                                                                                             | Comments                                                                                                                                                            |
|------------------------------|-------------------------------------------------------------------------------------------------------|------------|----------------------------------------------|-------------------------------------------------------------------------------------------------------------------------------------------------------------------------------------------------------------------------------------------------------------------------------------------|---------------------------------------------------------------------------------------------------------------------------------------------------------------------|
| Systematic reviews           |                                                                                                       |            |                                              |                                                                                                                                                                                                                                                                                           |                                                                                                                                                                     |
| Alharbi 2021 <sup>3</sup>    | 30 studies, including participants aged >65 years<br>Studies published before June 2020 were included | N/A        | Weight gain, weight loss, weight fluctuation | <b>All-cause mortality:</b> Based on 30 studies weight loss was associated with a 59% increase risk· Based on 27 studies weight gain was associated with a 10% increase risk·<br>Based on 4 studies weight fluctuation was associated with a 63% increased risk·                          | Only in 6 studies change in BMI was examined· In the rest of the studies change in weight (kg) was examined·<br><br>High heterogeneity between the included studies |
| Karahalios 2017 <sup>9</sup> | 26 studies including participants aged 40-65 years·<br>Studies were published before September 2015   | N/A        | Weight gain and weight loss                  | <b>All-cause mortality:</b> Weight loss increased the risk by 45%<br>Weight gain was not associated<br><br><b>Cancer mortality:</b> neither weight loss nor weight gain was associated<br><br><b>CVD mortality:</b> Weight gain increased the risk by 21%· Weight loss was not associated | High heterogeneity between the included studies<br><br>Most studies examined weight change and, in a few studies, change in BMI was examined·                       |
|                              |                                                                                                       |            | within 2.5 kg, weight gain 2.5-5 kg, >5 kg   | <b>Respiratory mortality:</b> only >5 kg weight loss and any weight gain increased the risk<br><br><b>Women</b><br><b>All-cause mortality:</b> any weight loss increased the risk                                                                                                         |                                                                                                                                                                     |

| Author, Year                 | Study population                                                                                      | Study name | Exposure                                     | Findings related to mortality                                                                                                                                                                                                                                                             | Comments                                                                                                                                                            |
|------------------------------|-------------------------------------------------------------------------------------------------------|------------|----------------------------------------------|-------------------------------------------------------------------------------------------------------------------------------------------------------------------------------------------------------------------------------------------------------------------------------------------|---------------------------------------------------------------------------------------------------------------------------------------------------------------------|
| Systematic reviews           |                                                                                                       |            |                                              |                                                                                                                                                                                                                                                                                           |                                                                                                                                                                     |
| Alharbi 2021 <sup>3</sup>    | 30 studies, including participants aged >65 years<br>Studies published before June 2020 were included | N/A        | Weight gain, weight loss, weight fluctuation | <b>All-cause mortality:</b> Based on 30 studies weight loss was associated with a 59% increase risk· Based on 27 studies weight gain was associated with a 10% increase risk·<br>Based on 4 studies weight fluctuation was associated with a 63% increased risk·                          | Only in 6 studies change in BMI was examined· In the rest of the studies change in weight (kg) was examined·<br><br>High heterogeneity between the included studies |
| Karahalios 2017 <sup>9</sup> | 26 studies including participants aged 40-65 years·<br>Studies were published before September 2015   | N/A        | Weight gain and weight loss                  | <b>All-cause mortality:</b> Weight loss increased the risk by 45%<br>Weight gain was not associated<br><br><b>Cancer mortality:</b> neither weight loss nor weight gain was associated<br><br><b>CVD mortality:</b> Weight gain increased the risk by 21%· Weight loss was not associated | High heterogeneity between the included studies<br><br>Most studies examined weight change and, in a few studies, change in BMI was examined·                       |
|                              |                                                                                                       |            |                                              | <b>Cancer mortality:</b> no association<br><b>CVD mortality:</b> any weight loss increased the risk<br><b>Respiratory mortality:</b> only >5 kg weight loss increased the risk                                                                                                            |                                                                                                                                                                     |

| Author, Year                 | Study population                                                                                     | Study name                     | Exposure                                                                                                                         | Findings related to mortality                                                                                                                                                                                                                                                              | Comments                                                                                                                                                            |
|------------------------------|------------------------------------------------------------------------------------------------------|--------------------------------|----------------------------------------------------------------------------------------------------------------------------------|--------------------------------------------------------------------------------------------------------------------------------------------------------------------------------------------------------------------------------------------------------------------------------------------|---------------------------------------------------------------------------------------------------------------------------------------------------------------------|
| Systematic reviews           |                                                                                                      |                                |                                                                                                                                  |                                                                                                                                                                                                                                                                                            |                                                                                                                                                                     |
| Alharbi 2021 <sup>3</sup>    | 30 studies, including participants aged >65 years. Studies published before June 2020 were included. | N/A                            | Weight gain, weight loss, weight fluctuation                                                                                     | <b>All-cause mortality:</b> Based on 30 studies weight loss was associated with a 59% increase risk. Based on 27 studies weight gain was associated with a 10% increase risk. Based on 4 studies weight fluctuation was associated with a 63% increased risk.                              | Only in 6 studies change in BMI was examined. In the rest of the studies change in weight (kg) was examined.<br><br>High heterogeneity between the included studies |
| Karahalios 2017 <sup>9</sup> | 26 studies including participants aged 40-65 years. Studies were published before September 2015.    | N/A                            | Weight gain and weight loss                                                                                                      | <b>All-cause mortality:</b> Weight loss increased the risk by 45%. Weight gain was not associated.<br><br><b>Cancer mortality:</b> neither weight loss nor weight gain was associated.<br><br><b>CVD mortality:</b> Weight gain increased the risk by 21%. Weight loss was not associated. | High heterogeneity between the included studies.<br><br>Most studies examined weight change and, in a few studies, change in BMI was examined.                      |
| Pan 2018 <sup>18</sup>       | 36338 participants aged 45-74 years                                                                  | Singapore Chinese Health Study | Weight change calculated as the difference between 1993-1998 and 1999-2004 surveys. 5 categories: weight loss $\geq 10\%$ , 5.1- | <b>All-cause mortality:</b> any weight loss and >10% weight gain increased the risk.<br><b>Cancer mortality:</b> no association.<br><b>CVD mortality:</b> >10% weight loss and >10%                                                                                                        | Magnitude of weight loss was greater than that of weight gain                                                                                                       |

| Author, Year                 | Study population                                                                                     | Study name | Exposure                                                        | Findings related to mortality                                                                                                                                                                                                                                                              | Comments                                                                                                                                                            |
|------------------------------|------------------------------------------------------------------------------------------------------|------------|-----------------------------------------------------------------|--------------------------------------------------------------------------------------------------------------------------------------------------------------------------------------------------------------------------------------------------------------------------------------------|---------------------------------------------------------------------------------------------------------------------------------------------------------------------|
| Systematic reviews           |                                                                                                      |            |                                                                 |                                                                                                                                                                                                                                                                                            |                                                                                                                                                                     |
| Alharbi 2021 <sup>3</sup>    | 30 studies, including participants aged >65 years. Studies published before June 2020 were included. | N/A        | Weight gain, weight loss, weight fluctuation                    | <b>All-cause mortality:</b> Based on 30 studies weight loss was associated with a 59% increase risk. Based on 27 studies weight gain was associated with a 10% increase risk. Based on 4 studies weight fluctuation was associated with a 63% increased risk.                              | Only in 6 studies change in BMI was examined. In the rest of the studies change in weight (kg) was examined.<br><br>High heterogeneity between the included studies |
| Karahalios 2017 <sup>9</sup> | 26 studies including participants aged 40-65 years. Studies were published before September 2015.    | N/A        | Weight gain and weight loss                                     | <b>All-cause mortality:</b> Weight loss increased the risk by 45%. Weight gain was not associated.<br><br><b>Cancer mortality:</b> neither weight loss nor weight gain was associated.<br><br><b>CVD mortality:</b> Weight gain increased the risk by 21%. Weight loss was not associated. | High heterogeneity between the included studies.<br><br>Most studies examined weight change and, in a few studies, change in BMI was examined.                      |
|                              |                                                                                                      |            | 9.9%, stable weight<br>±5%, weight gain<br>5.1–9.9% and<br>≥10% | weight gain increased the risk<br><br><b>Respiratory mortality:</b> only >10% weight loss increased the risk                                                                                                                                                                               |                                                                                                                                                                     |

| Author, Year                  | Study population                                                                                      | Study name                 | Exposure                                                                                                                             | Findings related to mortality                                                                                                                                                                                                                                                              | Comments                                                                                                                                                            |
|-------------------------------|-------------------------------------------------------------------------------------------------------|----------------------------|--------------------------------------------------------------------------------------------------------------------------------------|--------------------------------------------------------------------------------------------------------------------------------------------------------------------------------------------------------------------------------------------------------------------------------------------|---------------------------------------------------------------------------------------------------------------------------------------------------------------------|
| Systematic reviews            |                                                                                                       |                            |                                                                                                                                      |                                                                                                                                                                                                                                                                                            |                                                                                                                                                                     |
| Alharbi 2021 <sup>3</sup>     | 30 studies, including participants aged >65 years<br>Studies published before June 2020 were included | N/A                        | Weight gain, weight loss, weight fluctuation                                                                                         | <b>All-cause mortality:</b> Based on 30 studies weight loss was associated with a 59% increase risk. Based on 27 studies weight gain was associated with a 10% increase risk. Based on 4 studies weight fluctuation was associated with a 63% increased risk.                              | Only in 6 studies change in BMI was examined. In the rest of the studies change in weight (kg) was examined.<br><br>High heterogeneity between the included studies |
| Karahalios 2017 <sup>9</sup>  | 26 studies including participants aged 40-65 years. Studies were published before September 2015      | N/A                        | Weight gain and weight loss                                                                                                          | <b>All-cause mortality:</b> Weight loss increased the risk by 45%. Weight gain was not associated.<br><br><b>Cancer mortality:</b> neither weight loss nor weight gain was associated.<br><br><b>CVD mortality:</b> Weight gain increased the risk by 21%. Weight loss was not associated. | High heterogeneity between the included studies<br><br>Most studies examined weight change and, in a few studies, change in BMI was examined.                       |
| Haugsgjerd 2017 <sup>19</sup> | 2935 participants aged 71-74 years                                                                    | The Hordaland Health Study | Weight change measures between 1992-93 and 1997-99 surveys. 3 categories: weight loss ( $\geq 5\%$ ), stable weight ( $\pm < 5\%$ ), | <b>All-cause mortality:</b> Weight lost $\geq 5\%$ increased the risk; weight gain $\geq 5\%$ did not.                                                                                                                                                                                     |                                                                                                                                                                     |

| Author, Year                 | Study population                                                                                      | Study name                                | Exposure                                                                                            | Findings related to mortality                                                                                                                                                                                                                                                             | Comments                                                                                                                                                            |
|------------------------------|-------------------------------------------------------------------------------------------------------|-------------------------------------------|-----------------------------------------------------------------------------------------------------|-------------------------------------------------------------------------------------------------------------------------------------------------------------------------------------------------------------------------------------------------------------------------------------------|---------------------------------------------------------------------------------------------------------------------------------------------------------------------|
| Systematic reviews           |                                                                                                       |                                           |                                                                                                     |                                                                                                                                                                                                                                                                                           |                                                                                                                                                                     |
| Alharbi 2021 <sup>3</sup>    | 30 studies, including participants aged >65 years<br>Studies published before June 2020 were included | N/A                                       | Weight gain, weight loss, weight fluctuation                                                        | <b>All-cause mortality:</b> Based on 30 studies weight loss was associated with a 59% increase risk· Based on 27 studies weight gain was associated with a 10% increase risk·<br>Based on 4 studies weight fluctuation was associated with a 63% increased risk·                          | Only in 6 studies change in BMI was examined· In the rest of the studies change in weight (kg) was examined·<br><br>High heterogeneity between the included studies |
| Karahalios 2017 <sup>9</sup> | 26 studies including participants aged 40-65 years·<br>Studies were published before September 2015   | N/A                                       | Weight gain and weight loss                                                                         | <b>All-cause mortality:</b> Weight loss increased the risk by 45%<br>Weight gain was not associated<br><br><b>Cancer mortality:</b> neither weight loss nor weight gain was associated<br><br><b>CVD mortality:</b> Weight gain increased the risk by 21%· Weight loss was not associated | High heterogeneity between the included studies<br><br>Most studies examined weight change and, in a few studies, change in BMI was examined·                       |
|                              |                                                                                                       |                                           | and weight gain (≥5%)                                                                               |                                                                                                                                                                                                                                                                                           |                                                                                                                                                                     |
| Beleigoli 2017 <sup>20</sup> | 1138 participants aged >60 years                                                                      | The Bambuí (Brazil) Cohort Study of Aging | Weight and WC were assessed at baseline and three years later· 3 categories each for weight and WC: | <b>All-cause mortality:</b> Weight loss increased the risk by 69% whereas weight gain increased the risk by 37% except in those who were physically active in which                                                                                                                       |                                                                                                                                                                     |

| Author, Year                 | Study population                                                                                     | Study name | Exposure                                                                        | Findings related to mortality                                                                                                                                                                                                                                                              | Comments                                                                                                                                                            |
|------------------------------|------------------------------------------------------------------------------------------------------|------------|---------------------------------------------------------------------------------|--------------------------------------------------------------------------------------------------------------------------------------------------------------------------------------------------------------------------------------------------------------------------------------------|---------------------------------------------------------------------------------------------------------------------------------------------------------------------|
| Systematic reviews           |                                                                                                      |            |                                                                                 |                                                                                                                                                                                                                                                                                            |                                                                                                                                                                     |
| Alharbi 2021 <sup>3</sup>    | 30 studies, including participants aged >65 years. Studies published before June 2020 were included. | N/A        | Weight gain, weight loss, weight fluctuation                                    | <b>All-cause mortality:</b> Based on 30 studies weight loss was associated with a 59% increase risk. Based on 27 studies weight gain was associated with a 10% increase risk. Based on 4 studies weight fluctuation was associated with a 63% increased risk.                              | Only in 6 studies change in BMI was examined. In the rest of the studies change in weight (kg) was examined.<br><br>High heterogeneity between the included studies |
| Karahalios 2017 <sup>9</sup> | 26 studies including participants aged 40-65 years. Studies were published before September 2015.    | N/A        | Weight gain and weight loss                                                     | <b>All-cause mortality:</b> Weight loss increased the risk by 45%. Weight gain was not associated.<br><br><b>Cancer mortality:</b> neither weight loss nor weight gain was associated.<br><br><b>CVD mortality:</b> Weight gain increased the risk by 21%. Weight loss was not associated. | High heterogeneity between the included studies.<br><br>Most studies examined weight change and, in a few studies, change in BMI was examined.                      |
|                              |                                                                                                      |            | loss (>5% reduction), stable within 5% of baseline, gain (>5% increase) measure | weight gain was associated with decreased mortality. Similar relationship was observed for WC change.                                                                                                                                                                                      |                                                                                                                                                                     |

BMI, body mass index; WC, waist circumference; CVD, cardiovascular disease
