# Supplementary material for: Associations of Change in Body Size With All-Cause and Cause-Specific Mortality Among Healthy Older Adults
Source: PubMed Central journal article supplement (PMC10087052; doi:10.1001/jamanetworkopen.2023.7482), 2023-04-10
Supplement: jamanetwopen-e237482-s002.pdf [file jamanetwopen-e237482-s002.pdf]

## Data Sharing Statement

Hussain. Associations of Change in Body Size With All-Cause and Cause-Specific Mortality Among Healthy Older Adults. *JAMA Netw Open*. Published April 10, 2023.

doi:10.1001/jamanetworkopen.2023.7482

### Data

**Data available:** No

### Additional Information

**Explanation for why data not available:** Data can be obtained after communicating the corresponding author
